# Supplementary material
Source: PubMed Central journal article supplement (PMC3416366)
Supplement: supp_78.14.4995_AEM00485-12_supplemental.pdf [file supp_78.14.4995_AEM00485-12_supplemental.pdf]

1 **Table S1.** Putative haloalkane dehalogenases from psychrophilic organisms

| Protein<br>Accession No. <sup>a</sup> | Source Organism                        | Temperature Range |                   | Temperature<br>Optimum [°C] |                   |
|---------------------------------------|----------------------------------------|-------------------|-------------------|-----------------------------|-------------------|
|                                       |                                        | EGP <sup>b</sup>  | GOLD <sup>c</sup> | EGP <sup>b</sup>            | GOLD <sup>c</sup> |
| YP_268879                             | <i>Colwellia psychroerythraea</i> 34H  | Psychrophilic     | Psychrophile      | 8                           | 8                 |
| YP_066368                             | <i>Desulfotalea psychrophila</i> LSv54 | Psychrophilic     | Psychrophile      | 7                           | 10                |
| ZP_01736514                           | <i>Marinobacter</i> sp. ELB17          | Psychrophilic     | Psychrophile      | 12-15                       | 12-15             |
| ZP_01897865                           | <i>Moritella</i> sp. PE36              | Cryophilic        | Mesophile         | -                           | -                 |
| ZP_01221858                           | <i>Photobacterium profundum</i> 3TCK   | Psychrophilic     | Psychrophile      | 15                          | 15                |
| YP_129676                             | <i>Photobacterium profundum</i> SS9    | Psychrophilic     | Psychrotolerant   | 15                          | 15                |
| YP_580518                             | <i>Psychrobacter cryohalolentis</i> K5 | Psychrophilic     | Psychrophile      | -                           | -                 |
| YP_943362                             | <i>Psychromonas ingrahamii</i> 37      | Psychrophilic     | Psychrophile      | -                           | -                 |
| ZP_01216824                           | <i>Psychromonas</i> sp. CNPT3          | Psychrophilic     | Psychrophile      | -                           | -                 |
| YP_523535                             | <i>Rhodoferrax ferrireducens</i> T118  | Mesophilic        | Psychrotolerant   | 25                          | 25                |
| YP_001365757                          | <i>Shewanella baltica</i> OS185        | Mesophilic        | Psychrotolerant   | -                           | 4                 |
| YP_002358709                          | <i>Shewanella baltica</i> OS223        | Mesophilic        | Psychrotolerant   | -                           | 4                 |
| YP_001675030                          | <i>Shewanella halifaxensis</i> HAW-EB4 | Psychrophilic     | Psychrophile      | 10                          | 10                |
| YP_001093840                          | <i>Shewanella loihica</i> PV-4         | Mesophilic        | Psychrophile      | -                           | -                 |
| YP_002312624                          | <i>Shewanella piezotolerans</i> WP3    | Mesophilic        | Psychrotolerant   | 15-20                       | 15 – 20           |
| YP_001473250;<br>YP_001473516         | <i>Shewanella sediminis</i> HAW-EB3    | Psychrophilic     | Psychrophile      | 10                          | 10                |

2 <sup>a</sup>Accession number to Protein database of NCBI

3 <sup>b</sup>Information from the Entrez Genome Project database (3)

4 <sup>c</sup>Information from the Genomes OnLine Database (1)

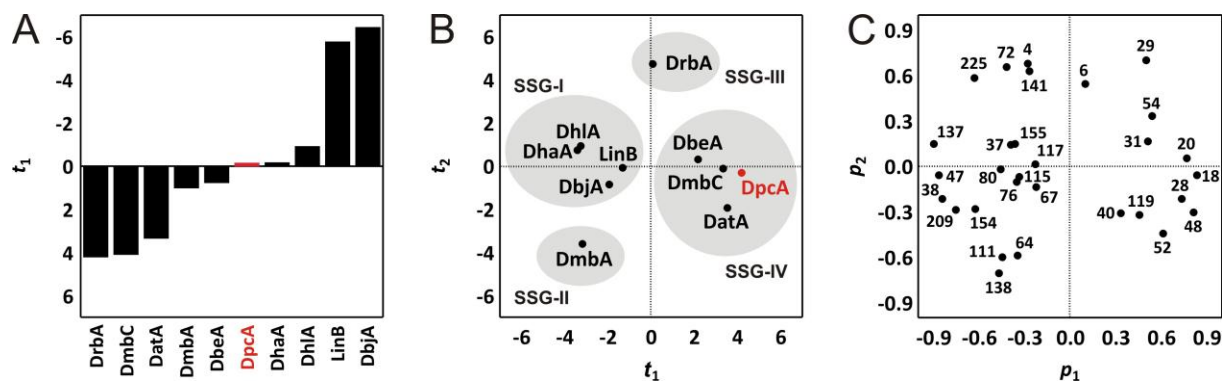

1  
2  
3 **Figure S1.** Quantitative comparison of activity and specificity of DpcA with the known  
4 biochemically characterized HLDs using the Principle Component Analysis (PCA) (4). The score  
5 plots (A+B) represent one-dimensional view and two-dimensional window into the  
6 multidimensional space, respectively. Enzymes (objects) with similar properties are collocated in  
7 these plots. A loading plot (C) quantifies contributions of original variables to newly created  
8 principal components (axes of the score plots). Variables localized further from the origin possess a  
9 stronger effect on the principal component than the variables localized closer to the origin of the  
10 plot. PCA was carried out as described previously (2). (A) The raw data concerning individual  
11 enzymes' specific activities towards thirty substrates were used as data matrix. The depicted  $t_1$  score  
12 plot explains 45% of the variance in the primary dataset and shows differences in overall activities  
13 of individual HLDs. The overall activity of DpcA is average due to exceptionally high as well as  
14 poor activities with specific substrates. (B) For the comparison of specificity profiles, the raw data  
15 were log-transformed and weighted relative to the individual enzymes' activity towards other  
16 substrates prior to analysis. Individual substrate specificity groups (SSGs) of HLDs are marked by  
17 grey in the  $t_1/t_2$  score plot. DpcA belongs to SSG-IV, together with DbeA, DatA and DmbC. The  
18 classification of DpcA into SSG-IV is further supported by the distribution of enzymes along the  
19 third principle component (*data not shown*). (C) Corresponding  $p_1/p_2$  loading plot enables

- 1 identification of substrates preferentially converted by members of SSG-IV as 1-bromobutane (**18**),
- 2 1-iodopropane (**28**) and 1,3-dibromopropane (**48**) which can be found in the right part of the plot.
- 3 Numbering of the substrates is provided in Table S2.

4

1 **Table S2.** Thirty halogenated substrates used for HLD substrate specificity testing.

| <b>Substrates</b>            |                                   |
|------------------------------|-----------------------------------|
| 1-chlorobutane (4)           | 1,2-dichloropropane (67)          |
| 1-chlorohexane (6)           | 1,2-dibromopropane (72)           |
| 1-bromobutane (18)           | 2-bromo-1-chloropropane (76)      |
| 1-bromohexane (20)           | 1,2,3-trichloropropane (80)       |
| 1-iodopropane (28)           | bis(2-chloroethyl)ether (111)     |
| 1-iodobutane (29)            | chlorocyclohexane (115)           |
| 1-iodohexane (31)            | bromocyclohexane (117)            |
| 1,2-dichloroethane (37)      | (1-bromomethyl)cyclohexane (119)  |
| 1,3-dichloropropane (38)     | 1-bromo-2-chloroethane (137)      |
| 1,5-dichloropentane (40)     | chlorocyclopentane (138)          |
| 1,2-dibromoethane (47)       | 4-bromobutyronitrile (141)        |
| 1,3-dibromopropane (48)      | 1,2,3-tribromopropane (154)       |
| 1-bromo-3-chloropropane (52) | 1,2-dibromo-3-chloropropane (155) |
| 1,3-diiodopropane (54)       | 3-chloro-2-methylpropene (209)    |
| 2-iodobutane (64)            | 2,3-dichloropropene (225)         |

2

1 **Table S3.** Comparison of amino acid composition of DpcA with biochemically characterized HLDs  
 2 from mesophilic organisms.

| Enzyme                  | Accession no. <sup>a</sup> | Amino acid composition [%] |   |   |   |   |    |   |   |   |    |   |   |    |   |    |   |   |   |   |   |
|-------------------------|----------------------------|----------------------------|---|---|---|---|----|---|---|---|----|---|---|----|---|----|---|---|---|---|---|
|                         |                            | A                          | C | D | E | F | G  | H | I | K | L  | M | N | P  | Q | R  | S | T | V | W | Y |
| <b>DpcA</b>             | YP_580518                  | 7                          | 1 | 9 | 4 | 5 | 8  | 3 | 5 | 4 | 9  | 2 | 4 | 8  | 5 | 6  | 5 | 6 | 5 | 2 | 3 |
| <b>DatA</b>             | BAJ23993                   | 9                          | 0 | 5 | 6 | 6 | 7  | 3 | 5 | 3 | 12 | 0 | 4 | 7  | 5 | 7  | 5 | 6 | 6 | 2 | 2 |
| <b>DbjA</b>             | BAC46352                   | 15                         | 1 | 4 | 8 | 6 | 7  | 4 | 5 | 2 | 9  | 2 | 1 | 8  | 3 | 8  | 5 | 4 | 6 | 1 | 3 |
| <b>DhaA</b>             | AAC15838                   | 8                          | 1 | 6 | 8 | 5 | 7  | 4 | 6 | 3 | 10 | 2 | 3 | 10 | 1 | 6  | 3 | 3 | 7 | 3 | 3 |
| <b>DhlA</b>             | P22643                     | 10                         | 1 | 8 | 6 | 7 | 6  | 2 | 5 | 4 | 9  | 4 | 3 | 7  | 4 | 5  | 4 | 5 | 5 | 2 | 4 |
| <b>DhmA</b>             | CAC41377                   | 11                         | 0 | 7 | 4 | 4 | 7  | 3 | 5 | 2 | 9  | 1 | 2 | 10 | 3 | 9  | 5 | 4 | 7 | 3 | 4 |
| <b>DmbA</b>             | AAK46969                   | 8                          | 0 | 6 | 7 | 4 | 9  | 3 | 6 | 2 | 8  | 3 | 3 | 7  | 4 | 8  | 5 | 3 | 7 | 3 | 3 |
| <b>DmbB</b>             | NP_216812                  | 11                         | 0 | 7 | 4 | 5 | 9  | 4 | 4 | 2 | 9  | 1 | 1 | 10 | 3 | 8  | 4 | 5 | 7 | 3 | 4 |
| <b>DmbC</b>             | NP_216349                  | 10                         | 1 | 6 | 5 | 6 | 7  | 3 | 6 | 2 | 8  | 3 | 2 | 8  | 2 | 10 | 5 | 4 | 7 | 2 | 3 |
| <b>DmlA</b>             | Q98C03                     | 12                         | 1 | 7 | 5 | 5 | 6  | 3 | 5 | 3 | 10 | 2 | 2 | 9  | 4 | 7  | 5 | 3 | 6 | 1 | 2 |
| <b>DppA</b>             | ZP_01908831                | 10                         | 1 | 7 | 6 | 7 | 11 | 2 | 3 | 2 | 9  | 4 | 1 | 9  | 3 | 6  | 3 | 4 | 7 | 2 | 2 |
| <b>DrbA</b>             | CAM90600                   | 11                         | 2 | 7 | 4 | 3 | 6  | 3 | 6 | 3 | 10 | 3 | 3 | 7  | 2 | 9  | 8 | 5 | 5 | 2 | 2 |
| <b>Jann2620</b>         | YP_510562                  | 13                         | 0 | 7 | 6 | 4 | 7  | 2 | 7 | 1 | 8  | 3 | 4 | 8  | 4 | 5  | 4 | 7 | 6 | 2 | 2 |
| <b>LinB</b>             | BAA03443                   | 12                         | 1 | 7 | 7 | 4 | 8  | 2 | 7 | 2 | 9  | 3 | 2 | 7  | 3 | 8  | 4 | 3 | 4 | 3 | 3 |
| <b>Sav4779</b>          | NP_825956                  | 12                         | 0 | 7 | 6 | 3 | 9  | 4 | 5 | 2 | 10 | 3 | 1 | 7  | 1 | 7  | 5 | 4 | 6 | 3 | 2 |
| <b>Mean<sup>b</sup></b> | -                          | 11                         | 1 | 7 | 6 | 5 | 8  | 3 | 5 | 2 | 9  | 2 | 2 | 8  | 3 | 7  | 5 | 4 | 6 | 2 | 3 |
| <b>Min<sup>b</sup></b>  | -                          | 8                          | 0 | 4 | 4 | 3 | 6  | 2 | 3 | 1 | 8  | 0 | 1 | 7  | 1 | 5  | 3 | 3 | 4 | 1 | 2 |
| <b>Max<sup>b</sup></b>  | -                          | 15                         | 2 | 8 | 8 | 7 | 11 | 4 | 7 | 4 | 12 | 4 | 4 | 10 | 5 | 10 | 8 | 7 | 7 | 3 | 4 |

3 <sup>a</sup>Accession number in the Protein Database of NCBI

4 <sup>b</sup>Data relates to HLDs from mesophilic organisms (without DpcA)

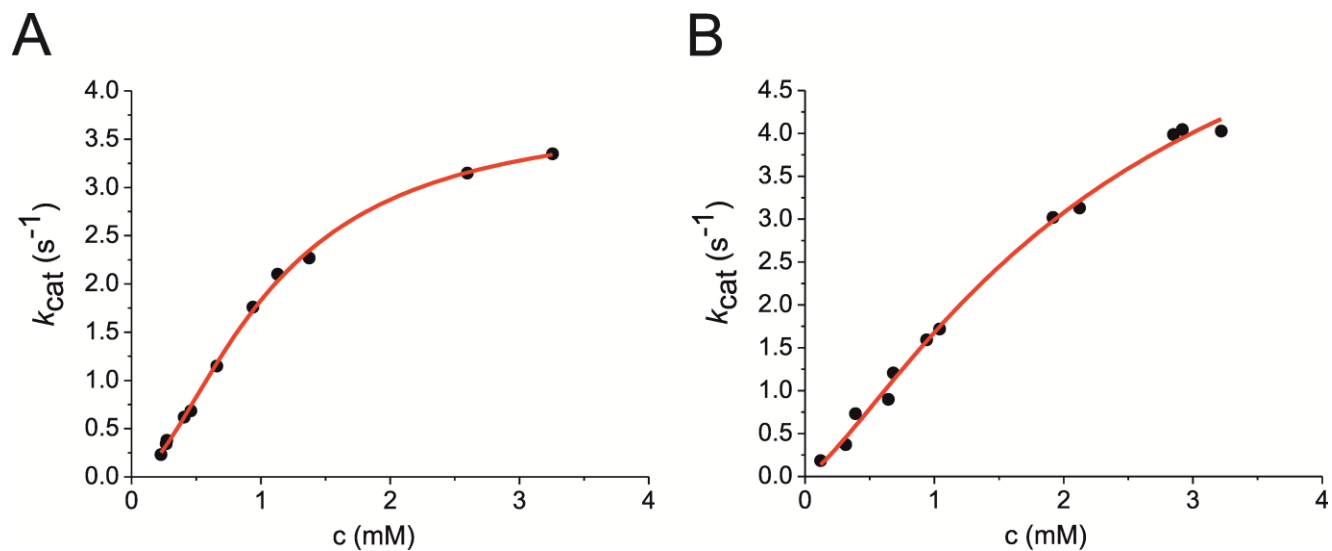

1

2

3 **Figure S2.** Steady-state kinetics of haloalkane dehalogenase DpcA with 1-bromobutane (A) and

4 1,3-dibromopropane (B). Red curve represents non-linear fit of Hill equation to the experimentally

5 observed data.

6

1 **References**

- 2 1. **Liolios, K., I. M. Chen, K. Mavromatis, N. Tavernarakis, P. Hugenholtz, V. M. Markowitz,**  
3 **N. C. Kyrpides.** 2010. The Genomes On Line Database (GOLD) in 2009: status of genomic and  
4 metagenomic projects and their associated metadata. *Nucleic Acids Res.* **38**:346-354.
- 5 2. **Koudelakova, T., E. Chovancova, J. Brezovsky, M. Monincova, A. Fortova, J. Jarkovsky, J.**  
6 **Damborsky.** 2011. Substrate specificity of haloalkane dehalogenases. *Biochem. J.* **435**:345-354.
- 7 3. **Sayers, E. W., T. Barrett, D. A. Benson, E. Bolton, S. H. Bryant, K. Canese, V. Chetvernin,**  
8 **D. M. Church, M. DiCuccio, S. Federhen, M. Feolo, L. Y. Geer, W. Helmberg, Y. Kapustin, D.**  
9 **Landsman, D. J. Lipman, Z. Lu, T. L. Madden, T. Madej, D. R. Maglott, A. Marchler-Bauer,**  
10 **V. Miller, I. Mizrachi, J. Ostell, A. Panchenko, K. D. Pruitt, G. D. Schuler, E. Sequeira, S. T.**  
11 **Sherry, M. Shumway, K. Sirotkin, D. Slotta, A. Souvorov, G. Starchenko, T. A. Tatusova, L.**  
12 **Wagner, Y. Wang, W. J. Wilbur, E. Yaschenko, J. Ye.** 2010. Database resources of the National  
13 Center for Biotechnology Information. *Nucleic Acids Res.* **38**:5-16.
- 14 4. **Wold, S., K. Esbensen, P. Geladi.** 1987. Principal Component Analysis. *Chemometr. Intell.*  
15 *Lab.* **2**:37–52.
